# Supplementary material for: Crystal structures of thiamine monophosphate kinase from Acinetobacter baumannii in complex with substrates and products
Source: PubMed Central journal article supplement (PMC6416309; doi:10.1038/s41598-019-40558-x), 2019-03-13
Supplement: 41598_2019_40558_MOESM1_ESM.pdf [file 41598_2019_40558_MOESM1_ESM.pdf]

# **Crystal structures of thiamine monophosphate kinase from *Acinetobacter baumannii* in complex with substrates and products**

**Amy H. Sullivan<sup>1,2</sup>, David M. Dranow<sup>1,2</sup>, Peter S. Horanyi<sup>1,2</sup>, Donald D. Lorimer<sup>1,2</sup>, Thomas E. Edwards<sup>1,2</sup>, Jan Abendroth<sup>1,2, \*</sup>**

## Affiliations

1) UCB/Beryllium Discovery, 7869 NE Day Road West, Bainbridge Island, WA, USA

2) Seattle Structural Genomics Center for Infectious Disease, Seattle WA, USA

\* corresponding author: [jan.abendroth@ucb.com](mailto:jan.abendroth@ucb.com)

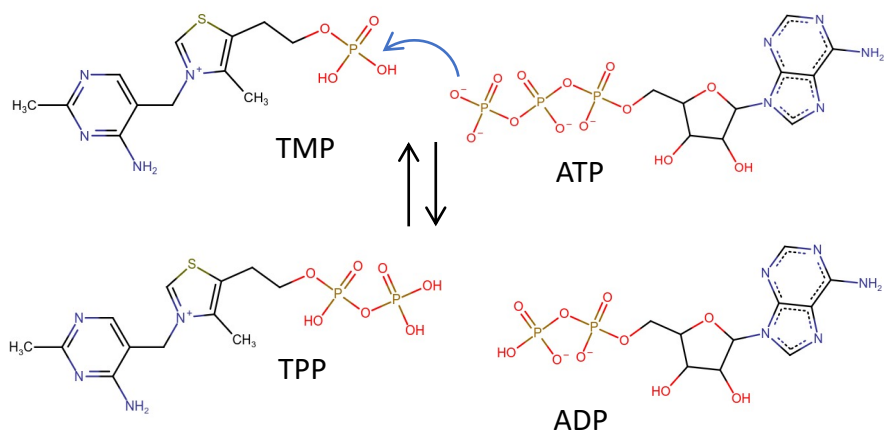

### Figure S1:

A schematic representation of the reaction carried out by ThiL, the conversion of TMP and ATP to TPP and ADP.

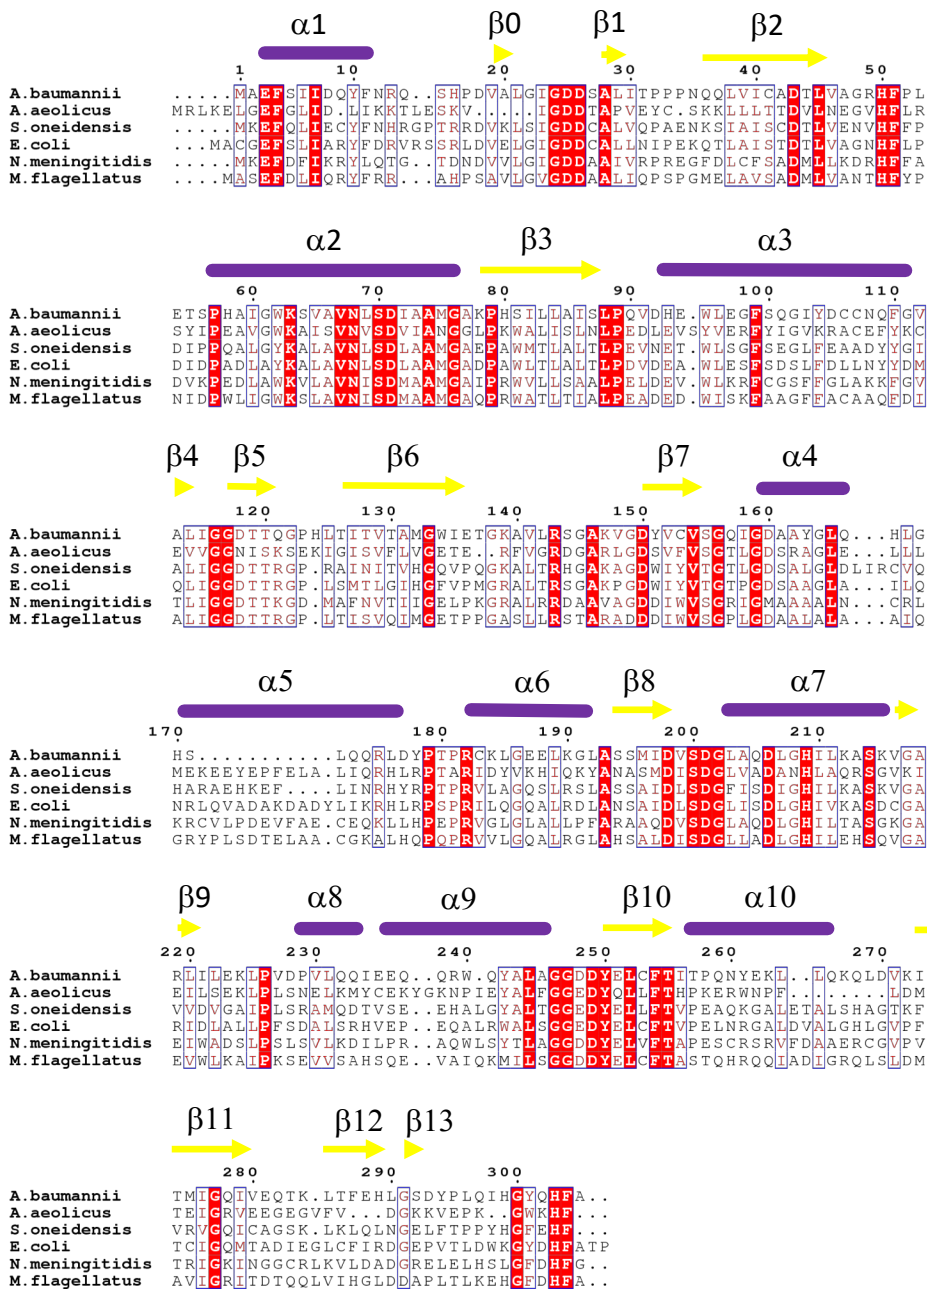

**Figure S2:**

Multiple sequence alignment of AbThiL with AaThiL, along with *Shevanella oneidensis*, *Escherichia coli*, *Neisseria meningitidis*, *Methylobacillus flagellatus*. The Figure was prepared with ESPript <sup>25</sup>
